# Supplementary material
Source: PubMed Central journal article supplement (PMC6215703)
Supplement: NIHMS80286-supplement-Supplementary_material.pdf [file NIHMS80286-supplement-Supplementary_material.pdf]

**Supplemental material to the manuscript are intended for publication as an online data supplement**

**S. Lachman et al. Ideal cardiovascular health and risk of cardiovascular events in the EPIC-Norfolk prospective population study.**

### **Food frequency questionnaire**

Dietary information was obtained from a 130 item food frequency questionnaire (FFQ), consisting of 11 fruit and 22 vegetable items (excl. fruit juices, potatoes, garlic, cooked vegetables were assumed to be cooked in salted water), 1 nuts and 3 legumes items (incl. peanuts/nuts, soya products, baked beans, dread beans), 6 wholegrain items (incl. whole meal bread, crisp bread, breakfast cereals, pasta, brown rice, porridge), 6 processed meat items (incl. bacon, ham, corned beef/spam, sausages, and the disaggregated processed meat components of savory pies and offal products), 6 fish items (inc. oily fish), and 9 sugar-sweetened beverage items (incl. juice, soft/fizzy drinks, squash, hot chocolate/Horlicks, sugar in tea/coffee).

The FFQ had the same frequency categories for every FFQ item, which were converted to a daily portion multiplier: never/< 1 per month (0), 1-3 times per month (0.07), 1 items per week (0.14), 2-4 times/week (0.43), 5-6 times/week (0.79), daily (1), 2-3 times per day (2.5), 4-5 times per day (4.5), up to 6 portions per day (6). Depending on the FFQ items, the portion size consisted of the weight of a unit or a minimal serving size. The frequency was multiplied by portion size to obtain the weight of the FFQ items consumed. Further elaborated information on FFQ is provided here:

<http://www.srl.cam.ac.uk/epic/epicffq/index.html>.

**Supplementary tables** – Sensitivity analysis, n = 21,856

**Table 1.** Baseline characteristics in EPIC-Norfolk participants

|                                                 |                 |
|-------------------------------------------------|-----------------|
| Age, years                                      | 59.0 ± 9.2      |
| Male                                            | 44.5 (9,736)    |
| Body mass index, kg/m <sup>2</sup>              | 26.2 ± 3.8      |
| Systolic blood pressure, mmHg                   | 135 ± 18        |
| Diastolic blood pressure, mmHg                  | 82 ± 11         |
| Total cholesterol, mmol/l                       | 6.2 ± 1.2       |
| LDL cholesterol, mmol/l                         | 4.0 ± 1.0       |
| HDL cholesterol, mmol/l                         | 1.4 ± 0.4       |
| Triglycerides, mmol/l                           | 1.8 (1.1 - 2.2) |
| Healthy diet                                    |                 |
| - Fruit and vegetables ≥ 4.5 cups per day       | 67.5 (7,111)    |
| - Fish ≥ 2 servings per week                    | 52.2 (10,437)   |
| - Fiber-rich whole grains ≥ 3 servings per day  | 44.6 (9,737)    |
| - Sodium < 1500 mg per day                      | 3.8 (828)       |
| - Sugar-sweetened beverages ≤ 450 kcal per week | 42.0 ( 9,405)   |
| Physical activity                               |                 |
| - Inactive                                      | 29.1 (6,368)    |
| - Moderately inactive                           | 29.0 (6,310)    |
| - Moderately active                             | 23.2 (5,077)    |
| - Active                                        | 18.8 (4,101)    |
| Smoking behaviour                               |                 |
| - Current                                       | 11.5 (2,513)    |
| - Former                                        | 41.5 (9,079)    |
| - Never                                         | 47.0 (10,264)   |

Data are presented as percentage (number) for categorical variables, mean ± standard deviation continuous variables.

Data were available in up to 21,856 study participants.

LDL indicates low-density lipoprotein; HDL indicates high-density lipoprotein.

**Table 2.** Distribution of cardiovascular health metrics in EPIC-Norfolk participants

| <b>Cardiovascular health metric</b> | <b>Definition</b>                                                                   | <b>Percentage (number)</b> |
|-------------------------------------|-------------------------------------------------------------------------------------|----------------------------|
| <b>Body mass index</b>              |                                                                                     |                            |
| - Ideal                             | < 25 kg/m <sup>2</sup>                                                              | 40.4 (8,827)               |
| - Intermediate                      | 25 to 30 kg/m <sup>2</sup>                                                          | 45.2 (9,882)               |
| - Poor                              | ≥ 30 kg/m <sup>2</sup>                                                              | 14.4 (3,147)               |
| <b>Healthy diet score</b>           |                                                                                     |                            |
| - Ideal                             | ≥ 4 healthy components                                                              | 9.3 (2,027)                |
| - Intermediate                      | 2 - 4 healthy components                                                            | 60.0 (13,073)              |
| - Poor                              | < 2 healthy components                                                              | 30.9 (6,756)               |
| <b>Physical activity</b>            |                                                                                     |                            |
| - Ideal                             | Active                                                                              | 18.8 (4,101)               |
| - Intermediate                      | Moderately active or moderately inactive                                            | 52.1 (11,387)              |
| - Poor                              | Inactive                                                                            | 29.1 (6,368)               |
| <b>Smoking behaviour</b>            |                                                                                     |                            |
| - Ideal                             | Never                                                                               | 47.0 (10,264)              |
| - Intermediate                      | Former                                                                              | 41.5 (9,079)               |
| - Poor                              | Current                                                                             | 11.5 (2,513)               |
| <b>Blood pressure</b>               |                                                                                     |                            |
| - Ideal                             | SBP < 120 and DBP < 80 mmHg, without drug therapy                                   | 17.7 (3,860)               |
| - Intermediate                      | SBP ≥ 120 to < 140 or DBP ≥ 80 to < 90 or treated to SBP < 140 and or DBP < 90 mmHg | 42.3 (9,240)               |
| - Poor                              | SBP ≥ 140 or DBP ≥ 90 mm Hg                                                         | 40.1 (8,756)               |
| <b>Total cholesterol</b>            |                                                                                     |                            |
| - Ideal                             | < 5.2 mmol/l                                                                        | 18.5 (4,040)               |
| - Intermediate                      | 5.2 - 6.2 mmol/l                                                                    | 37.6 (8,207)               |
| - Poor                              | ≥ 6.2 mmol/l                                                                        | 44.0 (9,609)               |
| <b>Total</b>                        |                                                                                     | <b>21,856</b>              |

Data are presented as percentage (number)

**Table 3.** Risk of cardiovascular disease by health metrics

| <b>Cardiovascular Health metrics</b> |                         | Poor       | Intermediate | Ideal       | Total  |
|--------------------------------------|-------------------------|------------|--------------|-------------|--------|
| <b>Body mass index</b>               |                         |            |              |             |        |
| Number                               |                         | 3,147      | 9,882        | 8,827       | 21,856 |
| Events                               |                         | 522        | 1,440        | 897         | 2,859  |
| Event rate                           |                         | 16.6       | 14.6         | 10.2        |        |
| Model 1                              | Hazard ratio            | 1.00 (ref) | 0.78         | 0.53        |        |
|                                      | 95% confidence interval |            | (0.73-0.84)  | (0.49-0.57) |        |
|                                      | p-value                 |            | < 0.001      | < 0.001     |        |
| Model 2                              | Hazard ratio            | 1.00 (ref) | 0.75         | 0.59        |        |
|                                      | 95% confidence interval |            | (0.70-0.80)  | (0.55-0.64) |        |
|                                      | p-value                 |            | < 0.001      | < 0.001     |        |
| <b>Healthy diet score</b>            |                         |            |              |             |        |
| Number                               |                         | 6,756      | 13,073       | 2,027       | 21,856 |
| Events                               |                         | 961        | 1,663        | 235         | 2,859  |
| Event rate                           |                         | 14.2       | 12.7         | 11.6        |        |
| Model 1                              | Hazard ratio            | 1.00 (ref) | 0.95         | 0.88        |        |
|                                      | 95% confidence interval |            | (0.90-1.01)  | (0.80-0.98) |        |
|                                      | p-value                 |            | 0.09         | 0.01        |        |
| Model 2                              | Hazard ratio            | 1.00 (ref) | 0.93         | 0.86        |        |
|                                      | 95% confidence interval |            | (0.88-0.98)  | (0.78-0.95) |        |
|                                      | p-value                 |            | 0.01         | 0.004       |        |
| <b>Physical activity</b>             |                         |            |              |             |        |
| Number                               |                         | 6,368      | 11,387       | 4,101       | 21,856 |
| Events                               |                         | 1,161      | 1,285        | 413         | 2,859  |
| Event rate                           |                         | 18.2       | 11.3         | 10.1        |        |
| Model 1                              | Hazard ratio            | 1.00 (ref) | 0.68         | 0.56        |        |
|                                      | 95% confidence interval |            | (0.64-0.72)  | (0.52-0.61) |        |
|                                      | p-value                 |            | <0.001       | <0.001      |        |
| Model 2                              | Hazard ratio            | 1.00 (ref) | 0.91         | 0.83        |        |
|                                      | 95% confidence interval |            | (0.85-0.96)  | (0.76-0.90) |        |
|                                      | p-value                 |            | 0.001        | < 0.001     |        |
| <b>Smoking behaviour</b>             |                         |            |              |             |        |
| Number                               |                         | 2,513      | 9,079        | 10,264      | 21,856 |
| Events                               |                         | 414        | 1,430        | 1,015       | 2,859  |
| Event rate                           |                         | 16.5       | 15.8         | 9.9         |        |
| Model 1                              | Hazard ratio            | 1.00 (ref) | 1.07         | 0.79        |        |
|                                      | 95% confidence interval |            | (0.98-1.16)  | (0.72-0.85) |        |
|                                      | p-value                 |            | 0.13         | < 0.001     |        |
| Model 2                              | Hazard ratio            | 1.00 (ref) | 0.80         | 0.72        |        |
|                                      | 95% confidence interval |            | (0.74-0.87)  | (0.66-0.79) |        |
|                                      | p-value                 |            | <0.001       | <0.001      |        |
| <b>Blood pressure</b>                |                         |            |              |             |        |
| Number                               |                         | 8,756      | 9,240        | 3,860       | 21,856 |
| Events                               |                         | 1,682      | 1,001        | 176         | 2,859  |
| Event rate                           |                         | 19.2       | 10.8         | 4.6         |        |
| Model 1                              | Hazard ratio            | 1.00 (ref) | 0.48         | 0.20        |        |
|                                      | 95% confidence interval |            | (0.45-0.51)  | (0.18-0.22) |        |
|                                      | p-value                 |            | <0.001       | <0.001      |        |

|                          |                         |            |             |             |        |
|--------------------------|-------------------------|------------|-------------|-------------|--------|
| Model 2                  | Hazard ratio            | 1.00 (ref) | 0.62        | 0.32        |        |
|                          | 95% confidence interval |            | (0.59-0.66) | (0.29-0.36) |        |
|                          | p-value                 |            | <0.001      | <0.001      |        |
| <b>Total cholesterol</b> |                         |            |             |             |        |
| Number                   |                         | 9,609      | 8,207       | 4,040       | 21,856 |
| Events                   |                         | 1,538      | 969         | 352         | 2,859  |
| Event rate               |                         | 16.0       | 11.8        | 8.7         |        |
| Model 1                  | Hazard ratio            | 1.00 (ref) | 0.76        | 0.65        |        |
|                          | 95% confidence interval |            | (0.72-0.81) | (0.60-0.70) |        |
|                          | p-value                 |            | <0.001      | <0.001      |        |
| Model 2                  | Hazard ratio            | 1.00 (ref) | 0.88        | 0.86        |        |
|                          | 95% confidence interval |            | (0.83-0.93) | (0.79-0.93) |        |
|                          | p-value                 |            | < 0.001     | < 0.001     |        |

**Table 4.** Risk of cardiovascular outcomes by cardiovascular health metrics among EPIC-Norfolk participants

| <b>Overall cardiovascular health score category</b> |                         | 1 (Unhealthy) | 2             | 3             | 4             | 5 (Healthy)   | Total          |
|-----------------------------------------------------|-------------------------|---------------|---------------|---------------|---------------|---------------|----------------|
| Overall cardiovascular health score range           |                         | 0-2           | 3-4           | 5-7           | 8-9           | 10-12         |                |
| Number (percentage)                                 |                         | 841 (3.8)     | 4,845 (22.2)  | 11,751 (53.8) | 3,752 (17.2)  | 667 (3.1)     | 21,856 (100.0) |
| <b>Coronary heart disease</b>                       |                         |               |               |               |               |               |                |
| Events                                              |                         | 205           | 830           | 1,311         | 156           | 4             |                |
| Event rate                                          |                         | 24.4          | 17.1          | 11.2          | 4.2           | 0.6           |                |
| Model 1                                             | Hazard ratio            | 1.00 (ref)    | 0.66          | 0.40          | 0.14          | 0.02          |                |
|                                                     | 95% confidence interval |               | (0.57 - 0.77) | (0.35-0.47)   | (0.12-0.17)   | (0.007 -0.05) |                |
|                                                     | p-value                 |               | < 0.001       | < 0.001       | < 0.001       | < 0.001       |                |
| Model 2                                             | Hazard ratio            | 1.00 (ref)    | 0.69          | 0.52          | 0.27          | 0.05          |                |
|                                                     | 95% confidence interval |               | (0.59 - 0.80) | (0.45-0.60)   | (0.22-0.33)   | (0.02 -0.15)  |                |
|                                                     | p-value                 |               | < 0.001       | < 0.001       | < 0.001       | < 0.001       |                |
| <b>Cerebrovascular disease</b>                      |                         |               |               |               |               |               |                |
| Events                                              |                         | 41            | 164           | 267           | 26            | 5             |                |
| Event rate                                          |                         | 4.9           | 3.4           | 2.3           | 0.7           | 0.7           |                |
| Model 1                                             | Hazard ratio            | 1.00 (ref)    | 0.66          | 0.42          | 0.12          | 0.13          |                |
|                                                     | 95% confidence interval |               | (0.47 - 0.93) | (0.30 - 0.58) | (0.08 - 0.20) | (0.05 - 0.33) |                |
|                                                     | p-value                 |               | 0.02          | < 0.001       | < 0.001       | < 0.001       |                |
| Model 2                                             | Hazard ratio            | 1.00 (ref)    | 0.69          | 0.56          | 0.27          | 0.45          |                |
|                                                     | 95% confidence interval |               | (0.49 - 0.97) | (0.40 - 0.78) | (0.16 - 0.44) | (0.17- 1.14)  |                |
|                                                     | p-value                 |               | 0.03          | 0.001         | < 0.001       | 0.09          |                |
| <b>Cardiovascular disease</b>                       |                         |               |               |               |               |               |                |
| Events                                              |                         | 236           | 941           | 1,495         | 178           | 9             |                |
| Event rate                                          |                         | 28.1          | 19.4          | 12.7          | 4.7           | 1.3           |                |
| Model 1                                             | Hazard ratio            | 1.00 (ref)    | 0.64          | 0.39          | 0.14          | 0.04          |                |
|                                                     | 95% confidence interval |               | (0.56 -0.74)  | (0.34 - 0.45) | (0.11 - 0.17) | (0.02 - 0.07) |                |
|                                                     | p-value                 |               | < 0.001       | <0.001        | <0.001        | <0.001        |                |
| Model 2                                             | Hazard ratio            | 1.00 (ref)    | 0.67          | 0.50          | 0.26          | 0.11          |                |
|                                                     | 95% confidence interval |               | (0.58 -0.77)  | (0.44 - 0.58) | (0.22 - 0.32) | (0.05 - 0.21) |                |
|                                                     | p-value                 |               | < 0.001       | <0.001        | <0.001        | <0.001        |                |

Physical activity Questionnaire in EPIC, table and questionnaire were adapted from Wareham et al.<sup>11</sup>

Interpretation of the physical activity index groups.  
EPIC physical activity questions

| Label               | Description                                                                                                                                                                                    |
|---------------------|------------------------------------------------------------------------------------------------------------------------------------------------------------------------------------------------|
| Very inactive       | Sedentary job and no recreational activity                                                                                                                                                     |
| Moderately inactive | Sedentary job with <0.5 h recreational activity per day or standing job with no recreational activity per day                                                                                  |
| Moderately active   | Sedentary job with 0.5–1.0 h recreational activity per day or standing job with 0.5 h recreational activity per day or physical job with no recreational activity per day                      |
| Very active         | Sedentary job with >1.0 h recreational activity per day or standing job with >0.5 h recreational activity per day or physical job with at least some recreational activity or heavy manual job |

1. We would like to know the type and amount of physical activity involved in your work. Please tick what best corresponds to your present activities from the following four possibilities:

Sedentary occupation \_\_\_\_\_

You spend most of your time sitting (such as in an office)

or Standing occupation \_\_\_\_\_

You spend most of your time standing or walking. However, your work does not require intense physical effort (e.g. shop assistant, hairdresser, guard, etc.)

or Physical work \_\_\_\_\_

This involves some physical effort including handling of heavy objects and use of tools (e.g. plumber, cleaner, nurse, sports instructor, electrician, carpenter, etc.)

or Heavy manual work \_\_\_\_\_

This involves very vigorous physical activity including handling of very heavy objects (e.g. docker, miner, bricklayer, construction worker, etc.)

2. In a typical week during the past 12 months, how many hours did you spend on each of the following activities? (Put '0' if none)

Walking, including walking to work, shopping and leisure

in summer \_\_\_\_\_ hours per week

in winter \_\_\_\_\_ hours per week

Cycling, including cycling to work and during leisure time

in summer \_\_\_\_\_ hours per week

in winter \_\_\_\_\_ hours per week

Gardening

in summer \_\_\_\_\_ hours per week

in winter \_\_\_\_\_ hours per week

Housework such as cleaning, washing, cooking, childcare

\_\_\_\_\_ hours per week

Do-it-yourself

\_\_\_\_\_ hours per week

Other physical exercise such as keep fit, aerobics, swimming, jogging

in summer \_\_\_\_\_ hours per week

in winter \_\_\_\_\_ hours per week

3. In a typical week during the past year did you practise any of these activities vigorously enough to cause sweating or a faster heartbeat?

Yes \_\_\_\_\_ No \_\_\_\_\_ Don't know \_\_\_\_\_

If yes, for how many hours per week in total did you practise such vigorous physical activity? (Put '0' if none)

\_\_\_\_\_ hours per week

4. In a typical day during the past 12 months, how many floors of stairs did you climb up? (Put '0' if none)

\_\_\_\_\_ floors per day
